# Supplementary material for: Piezoelectric core–shell PHBV/PDX blend scaffolds for reduced superficial wound contraction and scarless tissue regeneration
Source: Royal Society of Chemistry journal article supplement (doi:10.1039/d1bm00379h), 2021-01-01
Supplement: d1bm00379h1.pdf [file d1bm00379h1.pdf]

## Supporting Information

**Supporting Table 1: Zeta potential of nanoscaffolds**

| Samples | Zeta potential/ (mV) |
|---------|----------------------|
| PDX     | $17.4 \pm 1.6$       |
| 80/20   | $5.37 \pm 0.92$      |
| 20/80   | $7.38 \pm 0.34$      |
| PHBV    | $0.168 \pm 0.27$     |

**Supporting Table 2: Summary of DSC results**

| Blend composition | $T_m/ ^\circ\text{C}$ | $\Delta H_m/$ (J/g) | $\chi_{\text{blend}}/$ (%) | $\chi_{\text{PDX}}/$ (%) | $T_m/ ^\circ\text{C}$ | $\Delta H_m/$ (J/g) | $\chi_{\text{blend}}/$ (%) | $\chi_{\text{PHBV}}/$ (%) |
|-------------------|-----------------------|---------------------|----------------------------|--------------------------|-----------------------|---------------------|----------------------------|---------------------------|
| <b>100/0</b>      | 107.1                 | 38.8                | 27.5                       | 27.5                     |                       |                     |                            |                           |
| <b>90/10</b>      | 106.9                 | 51.6                | 36.5                       | 40.1                     | 155.0                 | 2.7                 | 2.5                        | 24.8                      |
| <b>80/20</b>      | 106.8                 | 44.5                | 31.5                       | 39.4                     | 153.3                 | 8.4                 | 7.7                        | 38.5                      |
| <b>70/30</b>      | 107.8                 | 41.1                | 29.1                       | 41.6                     | 156.3                 | 15.2                | 13.9                       | 46.5                      |
| <b>50/50</b>      | 105.6                 | 22.6                | 16.0                       | 32.0                     | 156.7                 | 24.7                | 22.7                       | 45.3                      |
| <b>30/70</b>      | 105.2                 | 16.5                | 11.7                       | 39.0                     | 155.3                 | 33.1                | 30.4                       | 43.4                      |
| <b>20/80</b>      | 104.7                 | 9.4                 | 6.7                        | 33.3                     | 155.6                 | 39.2                | 36.0                       | 45.0                      |
| <b>0/100</b>      |                       |                     |                            |                          | 156.7                 | 46.5                | 42.7                       | 42.7                      |

**Supporting Table 3: Summary of TGA results**

| Blend composition (wt %) | First stage         |                       | Second stage        |                       | Residual mass/ wt % |
|--------------------------|---------------------|-----------------------|---------------------|-----------------------|---------------------|
|                          | $T_{onset1}/$<br>°C | $\Delta W_1/$<br>wt % | $T_{onset2}/$<br>°C | $\Delta W_2/$<br>wt % |                     |
| <b>100/0</b>             | 335.2               | 93.8                  |                     |                       | 6.2                 |
| <b>90/10</b>             | 242.0               | 5.23                  | 276.1               | 94.2                  | 0.6                 |
| <b>80/20</b>             | 241.0               | 27.5                  | 273.0               | 72.1                  | 0.4                 |
| <b>70/30</b>             | 234.0               | 35.3                  | 273.2               | 64.3                  | 0.4                 |
| <b>50/50</b>             | 235.0               | 50.5                  | 279.3               | 49.2                  | 0.3                 |
| <b>30/70</b>             | 244.8               | 71.0                  | 285.1               | 28.7                  | 0.3                 |
| <b>20/80</b>             | 237.1               | 82.2                  | 276.5               | 17.0                  | 0.8                 |
| <b>0/100</b>             | 250.3               | 98.4                  |                     |                       | 1.6                 |

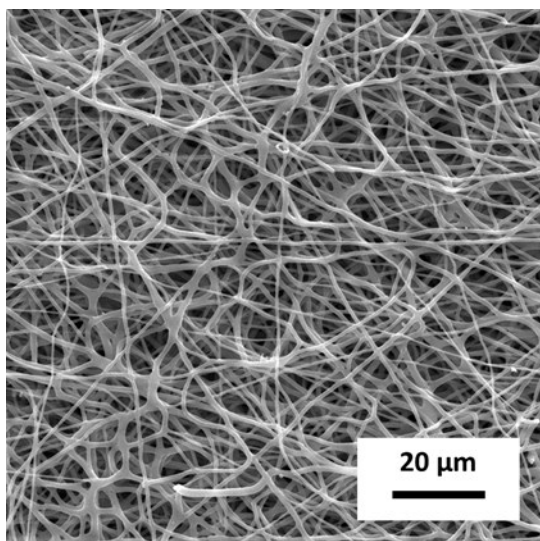

**Figure S1: SEM image of electrospun PDX/PHBV mat showing random deposition of fibers**

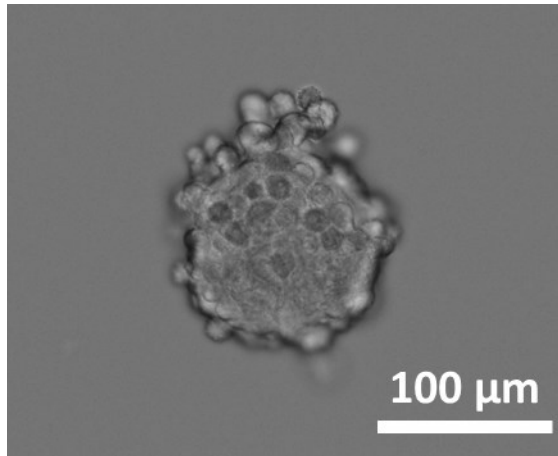

**Figure S2: Multicellular spheroids (MCS) consisting of 3000 fibroblast cells (mean diameter of  $136.3 \pm 16.7 \mu\text{m}$ )**

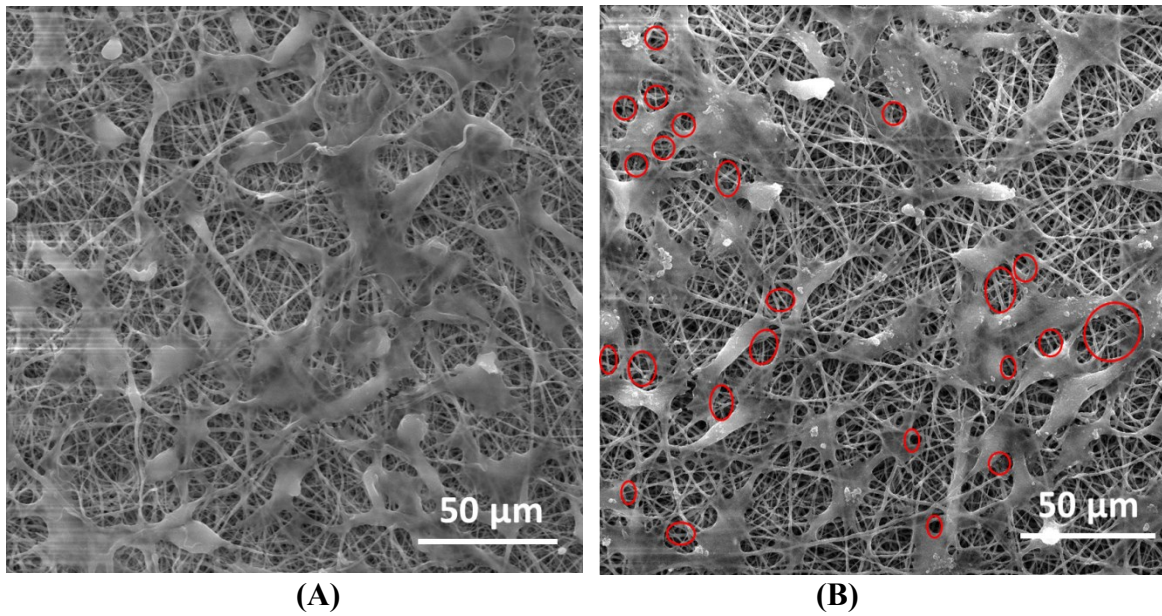

**Figure S3: SEM image showing (A) Eahy926 growing on scaffolds and (B) lumens formed after 7 days**

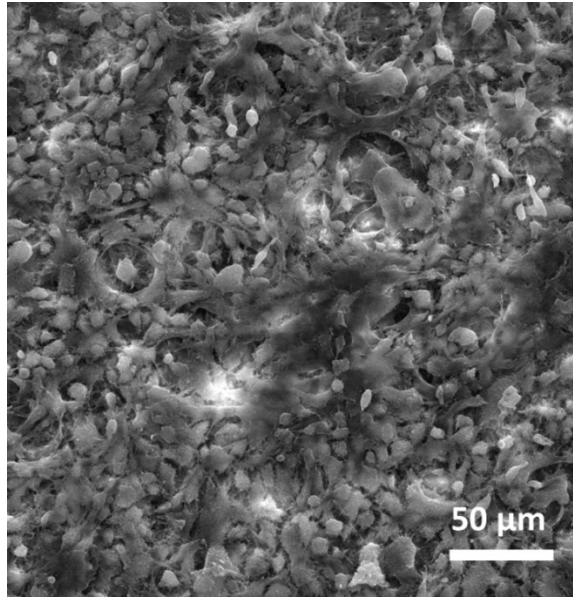

**Figure S4: SEM image showing multicellular infiltration following *in vivo* implantation**

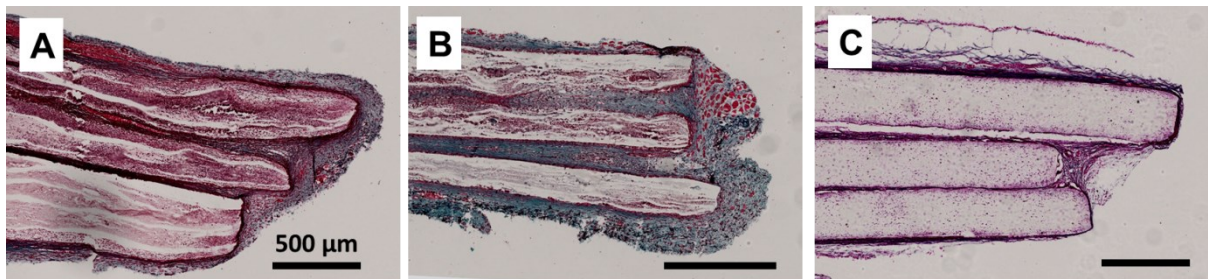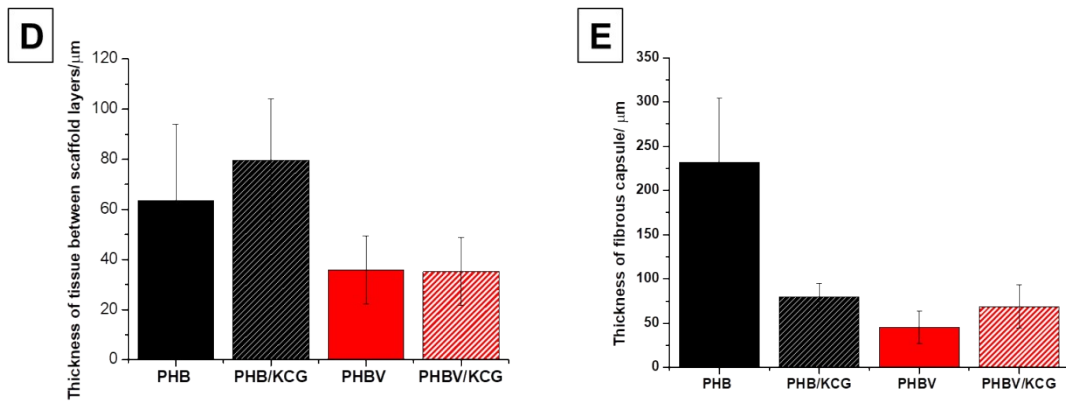

**Figure S5: Masson's Trichrome stained images of (A) PHB, (B) PHB/KCG 80/20, (C) PHBV/KCG 80/20, (D) Thickness of tissue formed between scaffold layers and (E) Summary of FC thickness after 2 weeks**

**Supporting Table 4: Summary of wound healing parameters as determined from histology images**

| Scaffold                        | Thickness             |                        |                    | Area of granulation tissue (GT)/ mm <sup>2</sup> | Granulation Tissue Scoring | Global Healing Index |
|---------------------------------|-----------------------|------------------------|--------------------|--------------------------------------------------|----------------------------|----------------------|
|                                 | Stratum corneum/ (μm) | Epidermis in GT / (μm) | Dermis in GT/ (mm) |                                                  |                            |                      |
| Negative control                | 27.1±11.3             | 27.2±12.1              | 1.57±0.16          | 2.99±1.52                                        | 9.0±0.8                    | 0.70±0.04            |
| PDX                             | 27.1±6.71             | 56.3±15.3              | 1.56±0.26          | 2.23±1.23                                        | 10.0±1                     | 0.64±0.18            |
| PDX/PHBV 20/80                  | 44.7±13.5             | 76.0±20.4              | 1.12±0.07          | 1.83±1.68                                        | 11.0±1.7                   | 0.73±0.11            |
| PDX/PHBV 20/80 + HA             | 52.2±22.9             | 75.3±29.2              | 1.22±0.34          | 1.33±0.38                                        | 12.0±0                     | 0.79±0.34            |
| PDX/PHBV 20/80 + CUR            | 26.0±11.7             | 36.1±15.7              | 1.04±0.24          | 1.99±0.96                                        | 10.2±0.4                   | 0.68±0.07            |
| PDX/PHBV 20/80 + HA + Fenugreek | 33.7±15.4             | 37.5±10.7              | 0.93±0.18          | 2.34±0.57                                        | 10.3±0.6                   | 0.65±0.16            |
